# Supplementary material
Source: PubMed Central journal article supplement (PMC6320221)
Supplement: NIHMS1000090-supplement-Supplemental.pdf [file NIHMS1000090-supplement-Supplemental.pdf]

**Supplementary Table 1.** Comparison between groups with AD and non-AD in FDG-PET analysis. Visual analysis of images was used to classify the patients.\*Fisher's test

|                                                                      |        | <i>AD</i>   | <i>Non-AD</i> | <i>U-Mann Whitney (p-value)</i> |
|----------------------------------------------------------------------|--------|-------------|---------------|---------------------------------|
| <i>Age</i>                                                           |        | 71.75±8.13  | 71.7±8.74     | 297.5 (0.960)                   |
| <i>Years of education</i>                                            |        | 11.85±5.18  | 11.60±4.43    | 293.5 (0.897)                   |
| <i>Impairment on other cognitive domain aside from verbal memory</i> |        | 8 (26.7%)   | 8 (40%)       | 0.366*                          |
| <i>FRI-FCSRT</i>                                                     | Raw    | 3.20±2.04   | 3.87±2.89     | 274.5 (0.610)                   |
|                                                                      | Scaled | 7.15±3.15   | 8.30±3.70     | 251.5 (0.334)                   |
| <i>TR-FCSRT</i>                                                      | Raw    | 24.50±12.20 | 26.73±10.49   | 273.0 (0.592)                   |
|                                                                      | Scaled | 5.40±3.25   | 5.93±3.17     | 272.0 (0.574)                   |
| <i>TDR-FCSRT</i>                                                     | Raw    | 7.25±5.07   | 8.33±4.17     | 260.0 (0.427)                   |
|                                                                      | Scaled | 5.80±4.02   | 6.07±4.30     | 295.5 (0.928)                   |
| <i>Index of Sensitivity to Cueing (%)</i>                            |        | 39.26±24.52 | 42.87±20.55   | 273.0 (0.593)                   |
| <i>FRA1</i>                                                          | Raw    | 5.40±2.18   | 6.53±5.40     | 225.0 (0.135)                   |
|                                                                      | Scaled | 5.95±3.23   | 8.13±3.74     | 197.0 ( <b>0.039</b> )          |
| <i>CRA1</i>                                                          | Raw    | 6.90±2.57   | 7.20±3.05     | 282.5 (0.727)                   |
|                                                                      | Scaled | 7.30±3.08   | 7.77±3.78     | 292.0 (0.873)                   |
| <i>CRA2</i>                                                          | Raw    | 9.25±2.51   | 10.07±2.59    | 239.0 (0.223)                   |
|                                                                      | Scaled | 6.15±3.37   | 7.73±3.79     | 224.0 (0.130)                   |
| <i>FRB1</i>                                                          | Raw    | 3.80±1.98   | 4.67±2.30     | 235.0 (0.191)                   |
|                                                                      | Scaled | 6.40±2.34   | 8.37±2.35     | 160.0 ( <b>0.005</b> )          |
| <i>CRB1</i>                                                          | Raw    | 5.05±2.13   | 5.07±2.13     | 293.5 (0.896)                   |
|                                                                      | Scaled | 7.70±2.43   | 8.07±3.27     | 276.5 (0.639)                   |
| <i>CRB2</i>                                                          | Raw    | 6.85±3.03   | 8.40±2.97     | 215.5 (0.092)                   |
|                                                                      | Scaled | 5.40±3.25   | 8.00±5.40     | 172.5 ( <b>0.011</b> )          |
| <i>SdFRA</i>                                                         | Raw    | 2.80±1.76   | 4.07±2.80     | 220.5 (0.113)                   |
|                                                                      | Scaled | 7.10±2.67   | 8.27±3.23     | 224.5 (0.132)                   |
| <i>SdCRA</i>                                                         | Raw    | 6.10±2.78   | 6.20±3.05     | 274.0 (0.604)                   |
|                                                                      | Scaled | 8.00±4.02   | 8.60±3.91     | 249.0 (0.309)                   |
| <i>DR</i>                                                            | Raw    | 7.25±5.82   | 12.63±6.48    | 167.0 ( <b>0.008</b> )          |
|                                                                      | Scaled | 3.60±2.78   | 7.37±4.66     | 145.0 ( <b>0.002</b> )          |
| <i>PD</i>                                                            |        | 28.37±22.58 | 16.17±28.38   | 214.5 (0.090)                   |

**Supplementary Table 2.** Comparison between groups with AD and non-AD in FDG-PET analysis. Semi-quantitative analysis of images was used to classify the patients.\*Fisher's test.

|                                                                      |        | <i>AD</i>   | <i>Non-AD</i> | <i>U-Mann Whitney (p-value)</i> |
|----------------------------------------------------------------------|--------|-------------|---------------|---------------------------------|
| <i>Age</i>                                                           |        | 73.76±7.59  | 70.28±8.80    | 237.0 (0.184)                   |
| <i>Years of education</i>                                            |        | 11.14±5.20  | 12.10±4.33    | 274.0 (0.546)                   |
| <i>Impairment on other cognitive domain aside from verbal memory</i> |        | 9 (42.9%)   | 7 (24.1%)     | 0.222*                          |
| <i>FRI-FCSRT</i>                                                     | Raw    | 2.67±1.93   | 4.28±2.81     | 202.0 ( <b>0.042</b> )          |
|                                                                      | Scaled | 6.76±2.82   | 8.62±3.78     | 2140 (0.074)                    |
| <i>TR-FCSRT</i>                                                      | Raw    | 21.76±10.58 | 28.79±10.75   | 195.5 ( <b>0.032</b> )          |
|                                                                      | Scaled | 4.76±2.56   | 6.41±3.43     | 219.5 (0.090)                   |
| <i>TDR-FCSRT</i>                                                     | Raw    | 6.05±4.44   | 9.24±4.18     | 182.0 ( <b>0.016</b> )          |
|                                                                      | Scaled | 5.00±3.033  | 6.66±4.73     | 253.0 (0.304)                   |
| <i>Index of Sensitivity to Cueing (%)</i>                            |        | 35.18±19.72 | 45.95±22.86   | 229.0 (0.138)                   |
| <i>FRA1</i>                                                          | Raw    | 5.05±1.93   | 6.83±2.63     | 181.5 ( <b>0.014</b> )          |
|                                                                      | Scaled | 6.33±2.97   | 7.93±4.03     | 226.0 (0.119)                   |
| <i>CRA1</i>                                                          | Raw    | 6.33±2.41   | 7.62±3.05     | 235.5 (0.172)                   |
|                                                                      | Scaled | 7.10±2.50   | 7.93±4.07     | 273.5 (0.538)                   |
| <i>CRA2</i>                                                          | Raw    | 9.19±2.80   | 10.14±2.35    | 235.5 (0.172)                   |
|                                                                      | Scaled | 6.67±3.59   | 7.41±3.77     | 264.5 (0.429)                   |
| <i>FRB1</i>                                                          | Raw    | 3.48±1.63   | 4.93±2.38     | 180.0 ( <b>0.013</b> )          |
|                                                                      | Scaled | 6.67±1.98   | 8.24±2.69     | 180.5 ( <b>0.013</b> )          |
| <i>CRB1</i>                                                          | Raw    | 4.62±1.98   | 5.38±2.77     | 265.0 (0.431)                   |
|                                                                      | Scaled | 7.76±2.16   | 8.03±3.43     | 281.5 (0.648)                   |
| <i>CRB2</i>                                                          | Raw    | 6.48±3.10   | 8.72±2.71     | 191.5 ( <b>0.025</b> )          |
|                                                                      | Scaled | 5.90±3.01   | 7.72±3.90     | 218.5 (0.089)                   |
| <i>SdFRA</i>                                                         | Raw    | 2.52±1.99   | 4.31±2.59     | 178.0 ( <b>0.012</b> )          |
|                                                                      | Scaled | 7.14±2.98   | 8.28±3.05     | 237.5 (0.089)                   |
| <i>SdCRA</i>                                                         | Raw    | 5.05±2.61   | 6.97±2.90     | 179.5 ( <b>0.013</b> )          |
|                                                                      | Scaled | 7.57±3.34   | 8.93±4.27     | 225.5 (0.118)                   |
| <i>DR</i>                                                            | Raw    | 8.38±6.48   | 12.00±8.38    | 202.5 ( <b>0.044</b> )          |
|                                                                      | Scaled | 4.76±4.03   | 6.66±4.54     | 221.5 (0.099)                   |
| <i>PD</i>                                                            |        | 32.59±26.33 | 12.69±24.01   | 181.5 ( <b>0.015</b> )          |

**Supplementary Table 3.** Cutoff points for percentage of decline (PD) from CRA2 to CRB2, to classify patients (AD versus non-AD) using FDG-PET as reference.

| <i>Only including patients with agreement between visual and semi-quantitative analysis (n=37)</i> |                        |                        |
|----------------------------------------------------------------------------------------------------|------------------------|------------------------|
| <i>Cutoff (<math>\geq</math>)</i>                                                                  | <i>Sensitivity (%)</i> | <i>Specificity (%)</i> |
| -4.54                                                                                              | 100                    | 30.4                   |
| 3.84                                                                                               | 78.6                   | 38.4                   |
| 14.83                                                                                              | 78.6                   | 52.2                   |
| 16.02                                                                                              | 78.6                   | 56.5                   |
| 18.33                                                                                              | 71.4                   | 56.5                   |
| 21.11                                                                                              | 71.4                   | 65.2                   |
| 22.64                                                                                              | 64.3                   | 65.2                   |
| 24.03                                                                                              | 57.1                   | 65.2                   |
| 27.50                                                                                              | 57.1                   | 78.3                   |
| 30.38                                                                                              | 50.0                   | 82.6                   |
| 35.4                                                                                               | 42.9                   | 91.3                   |
| 40.17                                                                                              | 35.7                   | 91.3                   |
| 52.27                                                                                              | 14.3                   | 95.7                   |
| <i>Visual analysis of FDG-PET images (n=50)</i>                                                    |                        |                        |
| -4.54                                                                                              | 100                    | 23.3                   |
| 3.84                                                                                               | 80                     | 30                     |
| 14.83                                                                                              | 75.0                   | 43.3                   |
| 16.02                                                                                              | 75.0                   | 46.7                   |
| 18.33                                                                                              | 70.0                   | 46.7                   |
| 21.82                                                                                              | 65.0                   | 56.7                   |
| 22.64                                                                                              | 60.0                   | 63.3                   |
| 24.03                                                                                              | 50.0                   | 63.3                   |
| 27.50                                                                                              | 45.0                   | 73.3                   |
| 30.38                                                                                              | 40.0                   | 76.7                   |
| 34.84                                                                                              | 35.0                   | 83.3                   |
| 40.17                                                                                              | 30.0                   | 86.7                   |
| 46.42                                                                                              | 20.0                   | 90.0                   |
| 52.27                                                                                              | 10.0                   | 93.3                   |
| <i>Semi-quantitative analysis of FDG-PET images (n=50)</i>                                         |                        |                        |
| -4.54                                                                                              | 100                    | 24.1                   |
| 3.84                                                                                               | 81.0                   | 31.0                   |
| 14.83                                                                                              | 81.0                   | 48.3                   |
| 16.02                                                                                              | 81.0                   | 51.7                   |
| 18.33                                                                                              | 76.2                   | 51.7                   |
| 21.82                                                                                              | 66.7                   | 62.1                   |
| 22.64                                                                                              | 57.1                   | 62.1                   |
| 24.03                                                                                              | 52.4                   | 65.5                   |
| 27.50                                                                                              | 52.4                   | 79.3                   |
| 30.38                                                                                              | 47.6                   | 82.8                   |
| 34.84                                                                                              | 42.9                   | 89.7                   |
| 40.17                                                                                              | 33.3                   | 89.7                   |
| 52.27                                                                                              | 14.3                   | 96.6                   |
